# Supplementary material for: Asian elephants exhibit post-reproductive lifespans
Source: BMC Evol Biol. 2019 Oct 21;19:193. doi: 10.1186/s12862-019-1513-1 (PMC6805341; doi:10.1186/s12862-019-1513-1)
Supplement: Supplementary file 1 — Additional file 1. Dataset containing the lx and mx series of the population. [file 12862_2019_1513_MOESM1_ESM.csv]

FULL	0.934190031	0.892449626	0.850457948	0.834708727	0.816747272	0.772688399	0.746427676	0.734730899	0.721077363	0.717248634	0.711892957	0.706091734	0.7032013	0.698219945	0.690397906	0.68509343	0.679411375	0.670948956	0.664990262	0.658188316	0.655078153	0.650342648	0.643662391	0.638900401	0.633323963	0.627033967	0.618549616	0.611482853	0.608085726	0.601101252	0.595203655	0.586333954	0.57912493	0.571769405	0.564206318	0.55546292	0.549150842	0.539989346	0.532227692	0.523698402	0.515497308	0.510634126	0.498715148	0.492221461	0.484784049	0.473575169	0.468427613	0.462139994	0.452236994
FULL -1lx	0.934190031	0.892449626	0.850457948	0.834708727	0.816747272	0.772688399	0.746427676	0.734730899	0.721077363	0.717248634	0.711892957	0.706091734	0.7032013	0.698219945	0.690397906	0.68509343	0.679411375	0.670948956	0.664990262	0.658188316	0.655078153	0.650342648	0.643662391	0.638900401	0.633323963	0.627033967	0.618549616	0.611482853	0.608085726	0.601101252	0.595203655	0.586333954	0.57912493	0.571769405	0.564206318	0.55546292	0.549150842	0.539989346	0.532227692	0.523698402	0.515497308	0.510634126	0.498715148	0.492221461	0.484784049	0.473575169	0.468427613	0.462139994	0.452236994
FULL -5lx	0.934190031	0.892449626	0.850457948	0.834708727	0.816747272	0.772688399	0.746427676	0.734730899	0.721077363	0.717248634	0.711892957	0.706091734	0.7032013	0.698219945	0.690397906	0.68509343	0.679411375	0.670948956	0.664990262	0.658188316	0.655078153	0.650342648	0.643662391	0.638900401	0.633323963	0.627033967	0.618549616	0.611482853	0.608085726	0.601101252	0.595203655	0.586333954	0.57912493	0.571769405	0.564206318	0.55546292	0.549150842	0.539989346	0.532227692	0.523698402	0.515497308	0.510634126	0.498715148	0.492221461	0.484784049	0.473575169	0.468427613	0.462139994	0.452236994
CAPT	0.934190031	0.892248843	0.849858085	0.835806543	0.819376611	0.774003965	0.744877683	0.737678122	0.727979338	0.725634799	0.722039581	0.719575282	0.717072412	0.714511439	0.709286492	0.705956509	0.702565747	0.697729995	0.692850764	0.687866226	0.687866226	0.685661527	0.682667372	0.678801758	0.675626077	0.670652143	0.661998567	0.65837614	0.65557056	0.651674152	0.646452404	0.63878263	0.63415377	0.626974671	0.622018349	0.6105467	0.603981681	0.595874545	0.587598509	0.578999507	0.57015982	0.564012544	0.556091019	0.552741073	0.543854561	0.534636687	0.528761559	0.52241642	0.511205767
CAPT -1lx	0.934190031	0.892248843	0.849858085	0.835806543	0.819376611	0.774003965	0.744877683	0.737678122	0.727979338	0.725634799	0.722039581	0.719575282	0.717072412	0.714511439	0.709286492	0.705956509	0.702565747	0.697729995	0.692850764	0.687866226	0.687866226	0.685661527	0.682667372	0.678801758	0.675626077	0.670652143	0.661998567	0.65837614	0.65557056	0.651674152	0.646452404	0.63878263	0.63415377	0.626974671	0.622018349	0.6105467	0.603981681	0.595874545	0.587598509	0.578999507	0.57015982	0.564012544	0.556091019	0.552741073	0.543854561	0.534636687	0.528761559	0.52241642	0.511205767
CAPT -5lx	0.934190031	0.892248843	0.849858085	0.835806543	0.819376611	0.774003965	0.744877683	0.737678122	0.727979338	0.725634799	0.722039581	0.719575282	0.717072412	0.714511439	0.709286492	0.705956509	0.702565747	0.697729995	0.692850764	0.687866226	0.687866226	0.685661527	0.682667372	0.678801758	0.675626077	0.670652143	0.661998567	0.65837614	0.65557056	0.651674152	0.646452404	0.63878263	0.63415377	0.626974671	0.622018349	0.6105467	0.603981681	0.595874545	0.587598509	0.578999507	0.57015982	0.564012544	0.556091019	0.552741073	0.543854561	0.534636687	0.528761559	0.52241642	0.511205767
[truncated: 155 more columns]
